# Supplementary material for: Aqueous synthesis of glutathione-capped Cu+and Ag+-doped ZnxCd1−xS quantum dots with full color emission
Source: Royal Society of Chemistry journal article supplement (doi:10.1039/c2tc00107a), 2012-11-14
Supplement: c2tc00107a.pdf [file c2tc00107a.pdf]

## Electronic supplementary information

# Aqueous Synthesis of Glutathione-capped $\text{Cu}^+$ and $\text{Ag}^+$ -doped $\text{Zn}_x\text{Cd}_{1-x}\text{S}$ Quantum Dots with Full Color Emission†

Yanyan Chen, Lijian Huang, Shenji Li, Daocheng Pan\*

State Key Laboratory of Rare Earth Resource Utilization, Changchun Institute of Applied Chemistry, Chinese Academy of Sciences, 5625 Renmin Street, Changchun, Jilin, 130022, P. R. China

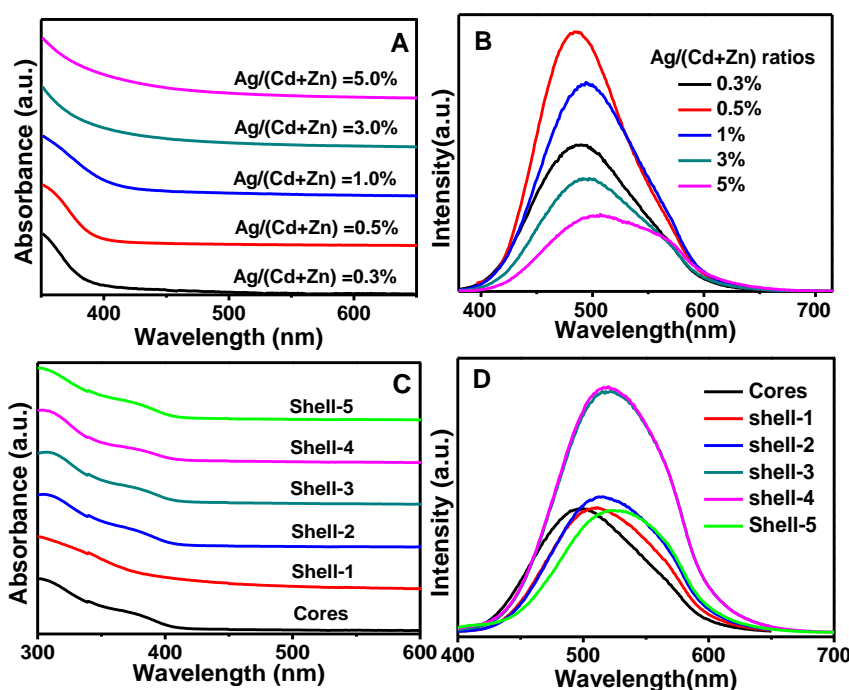

**Figure S1.** UV-vis absorption (A) and PL emission (B) spectra of Ag-doped  $\text{Zn}_x\text{Cd}_{1-x}\text{S}$  core QDs synthesized under different Ag/(Cd+Zn) ratios (0.3-5%) with fixation of growth time of 30 min; Evolution of UV-vis absorption (C) and PL emission (D) spectra of the Ag-doped  $\text{Zn}_x\text{Cd}_{1-x}\text{S}/\text{ZnS}$  core/shell QDs with deposition of different amount of ZnS shell around the core NCs.

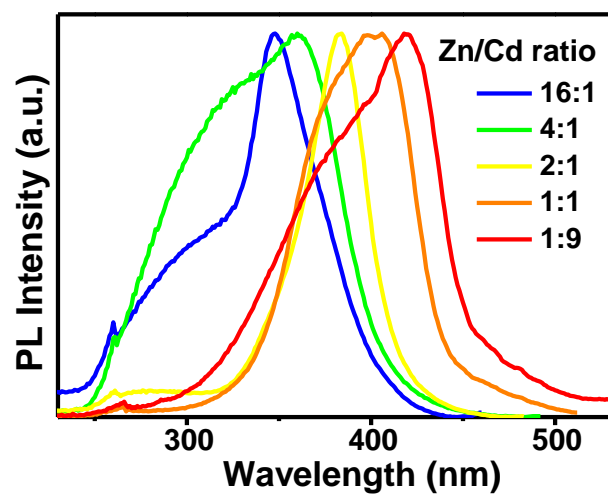

**Figure S2.** The excitation spectra of the Cu-doped Zn<sub>x</sub>Cd<sub>1-x</sub>S QDs with different Zn/Cd ratios.

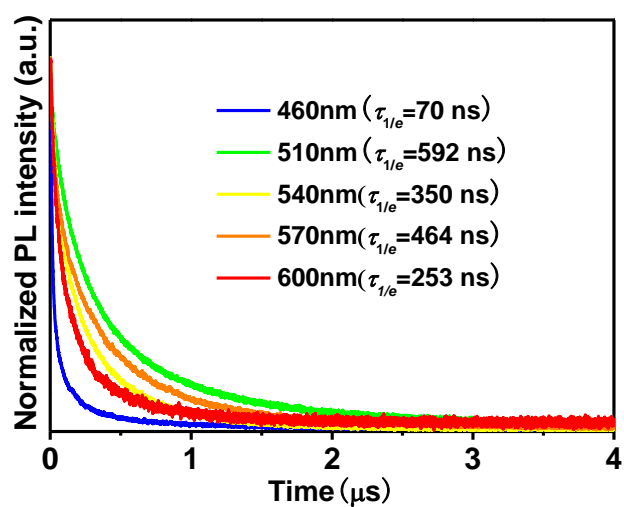

**Figure S3.** PL decay curves of Cu-doped  $Zn_xCd_{1-x}S$  d-dots with representative emission wavelengths.

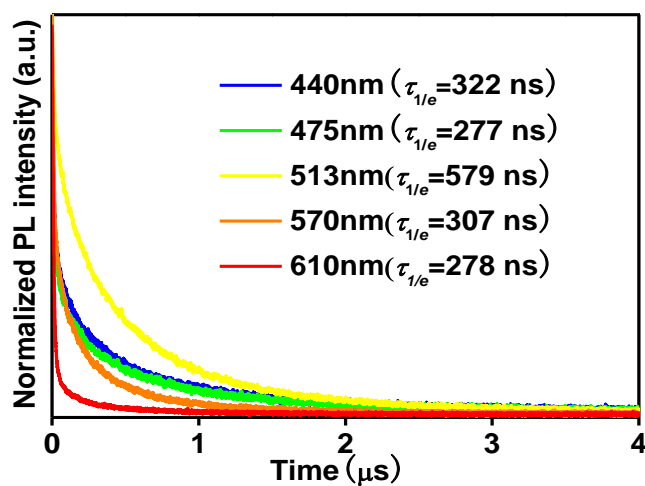

**Figure S4.** PL decay curves of Ag-doped  $Zn_xCd_{1-x}S$  core QDs with representative emission wavelengths.

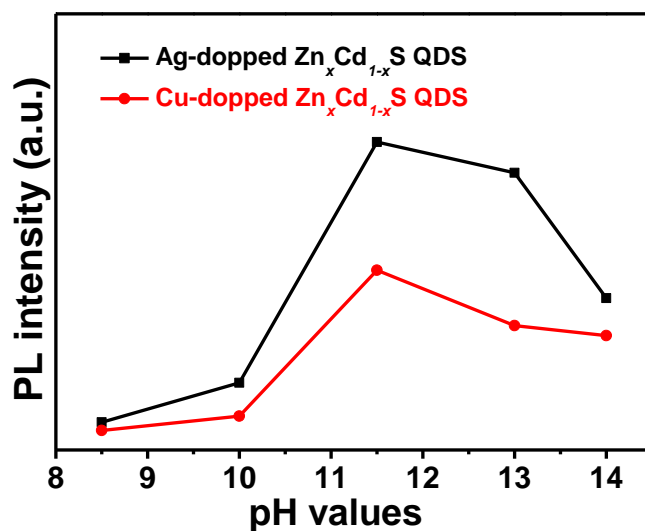

**Figure S5.** The PL intensity curves of Cu-doped and Ag-doped Zn<sub>x</sub>Cd<sub>1-x</sub>S/ZnS core/shell QDs synthesized under different pH values.

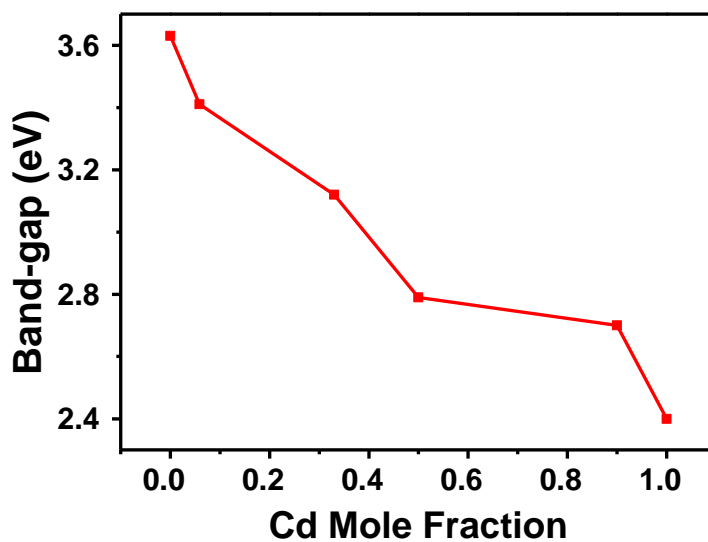

**Figure S6.** The band gap of alloyed Zn<sub>x</sub>Cd<sub>1-x</sub>S QDs as a function of Cd mole fraction.
